# Supplementary material
Source: MDPI journal article supplement (https://www.mdpi.com/1999-4907/12/12/1661)
Supplement: s1 [file s1]

### Supplementary file

**Table S1.** Result of multicollinearity test of different covariates using variance inflation factors analysis. Multiple linear regression (where aboveground carbon is used as response variable) was used where regression started by including all the covariates and gradually removes the variable with the highest variance inflation factor until achieving the threshold value. Covariates with a variance inflation factor below 2 (threshold value) do not imply multicollinearity.

| Steps | H    | MTH  | BA   | SD   | MDBH |
|-------|------|------|------|------|------|
| 1.00  | 1.34 | 2.89 | 3.56 | 2.38 | 5.41 |
| 2.00  | 1.33 | 1.05 | 1.32 | 1.32 | NA   |

H = Shannon Diversity Index, MTH: Mean tree height, BA: Basal Area, SD: Stem Density, MDBH: Mean Diameter at Breast Height.

**Table S2.** Fit statistics of the rejected and accepted structural equation models for predicting different carbon pools in combination of plant diversity and stand structure. The model with an insignificant Chi value ( $\chi^2, p > 0.05$ ) square along with comparative fit index close to one (CFI) and standardized root mean square residual close to zero (SRMR) indicates no significant deviation from the model based off of the observed dataset and, thus, it indicates a good fit.

| Response Variable | Predictors     | R <sup>2</sup> | chisq | df | p Value | cfi  | srmr | Remarks  |
|-------------------|----------------|----------------|-------|----|---------|------|------|----------|
| AGC               | H, MTH, BA, SD | 0.80           | 4.83  | 2  | 0.09    | 0.96 | 0.10 | Rejected |
| AGC               | H, MTH, BA     | 0.80           | 1.23  | 1  | 0.27    | 1.00 | 0.07 | Accepted |
| BGC               | H, MTH, BA, SD | 0.80           | 4.83  | 2  | 0.09    | 0.96 | 0.10 | Rejected |
| BGC               | H, MTH, BA     | 0.80           | 1.23  | 1  | 0.27    | 1.00 | 0.07 | Accepted |
| SOC1              | H, MTH, BA, SD | 0.27           | 4.83  | 2  | 0.09    | 0.87 | 0.08 | Rejected |
| SOC1              | H, MTH, BA     | 0.27           | 1.23  | 1  | 0.27    | 0.98 | 0.05 | Accepted |
| SOC2              | H, MTH, BA, SD | 0.04           | 4.83  | 2  | 0.09    | 0.75 | 0.08 | Rejected |
| SOC2              | H, MTH, BA     | 0.04           | 1.23  | 1  | 0.27    | 0.94 | 0.05 | Accepted |
| TBC               | H, MTH, BA, SD | 0.80           | 4.83  | 2  | 0.09    | 0.96 | 0.10 | Rejected |
| TBC               | H, MTH, BA     | 0.80           | 1.23  | 1  | 0.27    | 1.00 | 0.07 | Accepted |
| TSOC              | H, MTH, BA, SD | 0.19           | 4.83  | 2  | 0.09    | 0.84 | 0.08 | Rejected |
| TSOC              | H, MTH, BA     | 0.19           | 1.23  | 1  | 0.27    | 0.98 | 0.05 | Accepted |
| Total Carbon      | H, MTH, BA, SD | 0.61           | 4.83  | 2  | 0.09    | 0.94 | 0.09 | Rejected |
| Total Carbon      | H, MTH, BA     | 0.61           | 1.23  | 1  | 0.27    | 1.00 | 0.06 | Accepted |

H = Shannon Diversity Index, MTH: Mean tree height, BA: Basal Area, SD: Stem Density, AGC: Aboveground biomass Carbon, BGC: Belowground biomass Carbon, SOC1 = Soil Organic Carbon at 0–15 cm depth, SOC2 = Soil Organic Carbon at 15–30 cm, TBC = Total Biomass Carbon (AGC + BGC), TSOC= Total Soil Organic Carbon (0–30 cm).
